# Supplementary material for: Effect of Guided Delegation and Information Proximity on Multitier Responsible Sourcing
Source: Atypon-hosted journal article supplement (doi:10.1287/msom.2020.0446), 2023-09-19
Supplement: msom.2020.0446.sm1.pdf [file msom.2020.0446.sm1.pdf]

## Online Appendix for “Effect of Guided Delegation and Information Proximity on Multi-tier Responsible Sourcing”

**Proof of Proposition 1:** Based on the manufacturer’s best response function in §3.2 and the fact that  $w_1 < w_2$ , to obtain the optimal solution, the buyer compares the optimal profit from the following three sub-problems: (1) when  $w \geq w_2$ ,  $(\tilde{S}(H_M), \tilde{S}(L_M)) = (H_M, H)$ .

$$\begin{aligned} \tilde{\pi}_B^1 &= \max_w r - w \\ \text{s.t. } w &\geq w_2, \tilde{\pi}_M = w - c + \eta\varphi \geq 0. \end{aligned}$$

By the assumption that  $\theta\beta\gamma < 1$ , the optimal solution is achieved at  $w = w_2$ . So,  $\tilde{\pi}_B^1 = r - w_2$ .

(2) when  $w \in [w_1, w_2]$ ,  $(\tilde{S}(H_M), \tilde{S}(L_M)) = (H_M, L_M)$ .

$$\begin{aligned} \tilde{\pi}_B^2 &= \max_w r - w - (1 - \eta)\tau_B \\ \text{s.t. } w_1 &\leq w \leq w_2, \tilde{\pi}_M = \eta(w - c) + (1 - \eta)(1 - \tau_M)(w - \alpha c) + \varphi \geq 0. \end{aligned}$$

By the assumption that  $\theta\beta\gamma < 1$  and  $(1 - \alpha)c > \varphi$ , the optimal solution is achieved at  $w = w_1$ . So,  $\tilde{\pi}_B^2 = r - w_1 - (1 - \eta)\tau_B$ .

(3) when  $w \leq w_1$ ,  $(\tilde{S}(H_M), \tilde{S}(L_M)) = (L, L_M)$ .

$$\begin{aligned} \tilde{\pi}_B^3 &= \max_w r - w - \tau_B \\ \text{s.t. } w &\leq w_1, \tilde{\pi}_M = (1 - \tau_M)(w - \alpha c) + (1 - \eta)\varphi \geq 0. \end{aligned}$$

The optimal solution is achieved at  $w = \alpha c - \frac{(1-\eta)\varphi}{1-\tau_M}$ . So,  $\tilde{\pi}_B^3 = r - \alpha c + \frac{(1-\eta)\varphi}{1-\tau_M} - \tau_B$ .

First, comparing  $\tilde{\pi}_B^1$  and  $\tilde{\pi}_B^2$ , we have  $\tilde{\pi}_B^1 > \tilde{\pi}_B^2$  when  $\tau_B > \zeta_1 := \frac{2}{(1-\eta)\tau_M}\varphi$ , and  $\tilde{\pi}_B^1 < \tilde{\pi}_B^2$  otherwise. When  $\tau_B > \zeta_1$ , we compare  $\tilde{\pi}_B^1$  and  $\tilde{\pi}_B^3$  and get  $\tilde{\pi}_B^1 > \tilde{\pi}_B^3$  when  $\tau_B > \zeta_2 := \frac{(1-\alpha)c}{\tau_M} + \frac{1-\eta\tau_M}{\tau_M(1-\tau_M)}\varphi$ , and  $\tilde{\pi}_B^1 < \tilde{\pi}_B^3$  otherwise. When  $\tau_B < \zeta_1$ , we compare  $\tilde{\pi}_B^2$  and  $\tilde{\pi}_B^3$  and get  $\tilde{\pi}_B^2 > \tilde{\pi}_B^3$  when  $\tau_B > \zeta_3 := \frac{(1-\alpha)c}{\eta\tau_M} - \frac{1-(2-\eta)\tau_M}{\eta\tau_M(1-\tau_M)}\varphi$ . Proposition 1 and Figure 3 follow. ■

**Proof of Lemma 1:** When the manufacturer observes  $H_M$ , the manufacturer’s profit function when the buyer conducts auditing ( $A = 1$ ) is given by (1). The manufacturer will optimally choose  $H_B$  if  $w > w_3$ , and choose  $L$  otherwise (recall that we focus on the case where  $\mu s > (1 - \mu)\varphi$ ). The manufacturer’s optimal supplier selection when  $A = 0$  is the same as the full-delegation case, characterized by the threshold  $w_1$ . Since  $w_3 - w_1 = \frac{(1-\mu)\varphi - \mu s}{(1-\mu)\tau_M} < 0$ , part (i) follows. When the manufacturer observes  $L_M$ , the manufacturer’s profit function when  $A = 1$  is given by (2), the manufacturer will optimally choose  $H_B$  if  $w > w_4$ , and choose  $L_M$  otherwise. The manufacturer’s optimal supplier selection when  $A = 0$  is the same as the full-delegation case, characterized by the threshold  $w_2$ . Clearly,  $w_4 < w_2$ , so part (ii) follows. ■

**Proof of Lemma 2:** When the manufacturer always chooses a risk-free supplier, clearly it is optimal for the buyer not to conduct auditing, i.e.,  $A(\text{risk-free, risk-free}) = 0$ . When the manufacturer always chooses a risky supplier, from (3) the buyer’s profit is  $r - w - \tau_B$  if auditing is not performed, and  $r - w - (1 - \mu)\tau_B - I$  if auditing is performed. Comparing the two cases, we obtain that  $A(\text{risky, risky}) = 1$  if  $I \leq \mu\tau_B$ , and  $A(\text{risky, risky}) = 0$  otherwise. When the manufacturer se-

lects a risk-free supplier when observing  $H_M$  and a risky supplier when observing  $L_M$ , from (4) the buyer's profit is  $r - w - (1 - \eta)\tau_B$  if auditing is not performed, and  $r - w - (1 - \eta)(1 - \mu)\tau_B - I$  if auditing is performed. Comparing the two cases, we obtain that  $A(\text{risk-free, risky}) = 1$  if  $I \leq (1 - \eta)\mu\tau_B$ , and  $A(\text{risk-free, risky}) = 0$  otherwise. ■

**Proof of Proposition 2:** First, we have shown that  $w_3 < w_1$ ,  $w_4 < w_2$ ,  $w_3 < w_4$ , and  $w_1 < w_2$ . There are two possible cases: (1)  $w_3 < w_1 < w_4 < w_2$ , and (2)  $w_3 < w_4 < w_1 < w_2$ . Consider case (1) first. When  $w \geq w_2$ , by Lemma 1 the manufacturer's supplier selection decision is  $(S(H_M), S(L_M)) = (H_M, H_B)$  given  $A = 0$ , and is  $(S(H_M), S(L_M)) = (H_B, H_B)$  given  $A = 1$ . In both cases, the selected supplier is risk free. By Lemma 2 the buyer's best response is not to audit. Therefore, the fixed point is  $(A^*, S^*(H_M), S^*(L_M)) = (0, H_M, H_B)$ . When  $w \in [w_4, w_2]$ , the manufacturer's supplier selection decision is  $(S(H_M), S(L_M)) = (H_M, L_M)$  given  $A = 0$ , and is  $(S(H_M), S(L_M)) = (H_B, H_B)$  given  $A = 1$ . The latter is not a fixed point. The former is a fixed point if and only if  $I \geq (1 - \eta)\mu\tau_B$ . When  $w \in [w_1, w_4]$ , the manufacturer's supplier selection decision is  $(S(H_M), S(L_M)) = (H_M, L_M)$  given  $A = 0$ , and is  $(S(H_M), S(L_M)) = (H_B, L_M)$  given  $A = 1$ . The former is a fixed point if and only if  $I \geq (1 - \eta)\mu\tau_B$ , and the latter is a fixed point if and only if  $I \leq (1 - \eta)\mu\tau_B$ . When  $w \in [w_3, w_1]$ , the manufacturer's supplier selection decision is  $(S(H_M), S(L_M)) = (L, L_M)$  given  $A = 0$ , and is  $(S(H_M), S(L_M)) = (H_B, L_M)$  given  $A = 1$ . The former is a fixed point if and only if  $I \geq \mu\tau_B$ , and the latter is a fixed point if and only if  $I \leq (1 - \eta)\mu\tau_B$ . When  $w \leq w_3$ , the manufacturer's supplier selection decision is  $(S(H_M), S(L_M)) = (L, L_M)$  given  $A = 0$ , and is  $(S(H_M), S(L_M)) = (L, L_M)$  given  $A = 1$ . The former is a fixed point if and only if  $I \geq \mu\tau_B$ , and the latter is a fixed point if and only if  $I \leq \mu\tau_B$ . Combine the same fixed points, we have (5).

Finally, for case (2), when  $w \in [w_1, w_2]$ , the manufacturer's supplier selection decision is  $(S(H_M), S(L_M)) = (H_M, L_M)$  given  $A = 0$ , and is  $(S(H_M), S(L_M)) = (H_B, H_B)$  given  $A = 1$ . The latter is not a fixed point. The former is a fixed point if and only if  $I \geq (1 - \eta)\mu\tau_B$ . When  $w \in [w_4, w_1]$ , the manufacturer's supplier selection decision is  $(S(H_M), S(L_M)) = (L, L_M)$  given  $A = 0$ , and is  $(S(H_M), S(L_M)) = (H_B, H_B)$  given  $A = 1$ . The latter is not a fixed point. The former is a fixed point if and only if  $I \geq \mu\tau_B$ . When  $w \in [w_3, w_4]$ , the manufacturer's supplier selection decision is  $(S(H_M), S(L_M)) = (L, L_M)$  given  $A = 0$ , and is  $(S(H_M), S(L_M)) = (H_B, L_M)$  given  $A = 1$ . The former is a fixed point if and only if  $I \geq \mu\tau_B$ , and the latter is a fixed point if and only if  $I \leq (1 - \eta)\mu\tau_B$ . Combine the same fixed points, we get the same form as (5). ■

**Proof of Proposition 3:** We first solve for the optimal wholesale price for the five cases in (5).

Case 1:  $(A^*, S^*(H_M), S^*(L_M)) = (0, H_M, H_B)$  when  $w \geq w_2$ . The buyer solves the problem  $\max_w \pi_B^1 = r - w$  subject to  $w - c + \eta\varphi \geq 0$ ,  $w \geq w_2$ . Since  $\tau_M < 1$ , we have  $w_2 > w - c + \eta\varphi$ , and therefore  $w^* = w_2$ .

Case 2:  $(A^*, S^*(H_M), S^*(L_M)) = (0, H_M, L_M)$  when  $w_1 \leq w \leq w_2$  and  $I \geq (1 - \eta)\mu\tau_B$ . The buyer solves the problem  $\max_w \pi_B^2 = r - w - (1 - \eta)\tau_B$  subject to  $\eta(w - c) + (1 - \eta)(1 - \tau_M)(w - \alpha c) + \varphi \geq 0$ ,  $w_1 \leq w \leq w_2$ ,  $I \geq (1 - \eta)\mu\tau_B$ . The first constraint is equivalent to  $w \geq \alpha c + \frac{\eta(1 - \alpha)c - \varphi}{1 - (1 - \eta)\tau_M}$ . By the assumption  $(1 - \alpha)c > \varphi$ , we have  $w_1 > \alpha c + \frac{\eta(1 - \alpha)c - \varphi}{1 - (1 - \eta)\tau_M}$ , and therefore  $w^* = w_1$ .

Case 3:  $(A^*, S^*(H_M), S^*(L_M)) = (1, H_B, L_M)$  when  $w_3 \leq w \leq w_4$  and  $I \leq (1 - \eta)\mu\tau_B$ . The buyer solves the problem  $\max_w \pi_B^3 = r - w - (1 - \eta)(1 - \mu)\tau_B - I$  subject to  $w - c - (1 - \eta)[\mu s + (1 - \mu)(\tau_M(w - \alpha c) - (1 - \alpha)c - \varphi)] \geq 0$ ,  $w_3 \leq w \leq w_4$ ,  $I \leq (1 - \eta)\mu\tau_B$ . The first constraint

is equivalent to  $w \geq w_{31} := \alpha c + \frac{(1-\alpha)c[1-(1-\eta)(1-\mu)]+(1-\eta)\mu s-(1-\eta)(1-\mu)\varphi}{1-(1-\eta)(1-\mu)\tau_M}$ . We have  $w^* = w_3$  when  $(1-\alpha)c(1-\tau_M) + \varphi(1-\eta)\tau_M(1-\mu) > \frac{\mu s}{1-\mu}$  and  $w^* = w_{31}$  otherwise.

Case 4:  $(A^*, S^*(H_M), S^*(L_M)) = (0, L, L_M)$  when  $w < w_1$  and  $I \geq \mu\tau_B$ . The buyer solves the problem  $\max_w \pi_B^4 = r - w - \tau_B$  subject to  $(1-\tau_M)(w - \alpha c) + (1-\eta)\varphi \geq 0$ ,  $w < w_1$ ,  $I \geq \mu\tau_B$ . The optimal wholesale price is  $w^* = \alpha c - \frac{(1-\eta)\varphi}{1-\tau_M}$ .

Case 5:  $(A^*, S^*(H_M), S^*(L_M)) = (1, L, L_M)$  when  $w < w_3$  and  $I \leq \mu\tau_B$ . The buyer solves the problem  $\max_w \pi_B^5 = r - w - (1-\mu)\tau_B - I$  subject to  $w - c - \mu s - (1-\mu)[\tau_M(w - \alpha c) - (1-\alpha)c - (1-\eta)\varphi] \geq 0$ ,  $w < w_3$ ,  $I \leq \mu\tau_B$ . The optimal solution exists only when  $(1-\alpha)c(1-\tau_M) + \varphi(1-\eta)\tau_M(1-\mu) > \frac{\mu s}{1-\mu}$ , and  $w^* = \alpha c + \frac{\mu s + \mu(1-\alpha)c - (1-\eta)(1-\mu)\varphi}{1-(1-\mu)\tau_M}$ .

When  $I \geq \mu\tau_B$ , the buyer compares Cases 1, 2, and 4 to obtain the optimal contract. The analysis is identical to the full-delegation model. See the proof of Proposition 1. The optimal solution is characterized by the boundary lines  $\zeta_1, \zeta_2$ , and  $\zeta_3$  defined there. This corresponds to Figure 4 (i).

When  $I$  is between  $(1-\eta)\mu\tau_B$  and  $\mu\tau_B$ , the buyer compares Cases 1, 2, and 5 to obtain the optimal contract. Define:

$$\begin{aligned}\zeta_4 &:= \frac{(1-\tau_M)(1-\alpha)c - \mu s \tau_M}{(1-\mu)[1-(1-\mu)\tau_M]\tau_M} - \frac{I}{1-\mu} + \frac{1-\eta(1-\mu)\tau_M}{(1-\mu)[1-(1-\mu)\tau_M]\tau_M} \varphi \\ \zeta_5 &:= \frac{(1-\tau_M)(1-\alpha)c - \mu s \tau_M}{(\eta-\mu)[1-(1-\mu)\tau_M]\tau_M} - \frac{I}{\eta-\mu} - \frac{1-(2-\eta)(1-\mu)\tau_M}{(\eta-\mu)[1-(1-\mu)\tau_M]\tau_M} \varphi\end{aligned}$$

When  $\eta > \mu$ , we have  $\pi_B^{2*} > (<)\pi_B^{5*}$  if  $\tau_B > (<)\zeta_5$ . In this case, we have  $\pi_B^{1*} > \pi_B^{2*}$  when  $\tau_B > \zeta_1$ , and  $\pi_B^{1*} > \pi_B^{5*}$  when  $\tau_B > \zeta_4$ . We also have  $\pi_B^{2*} > \pi_B^{1*}$  when  $\tau_B < \zeta_1$ , and  $\pi_B^{2*} > \pi_B^{5*}$  when  $\tau_B > \zeta_5$ . Finally, we have  $\pi_B^{5*} > \pi_B^{1*}$  when  $\tau_B < \zeta_4$ , and  $\pi_B^{5*} > \pi_B^{2*}$  when  $\tau_B < \zeta_5$ . This corresponds to Figure 4 (ii). Similarly, when  $\eta < \mu$ , the intercept of  $\zeta_5$  is negative and the slope is positive. We have  $\pi_B^{2*} > (<)\pi_B^{5*}$  if  $\tau_B < (>)\zeta_5$ . The equilibrium can be characterized similarly as Figure 4 (ii).

When  $I \leq (1-\eta)\mu\tau_B$ , the buyer compares Cases 1, 3, and 5 to obtain the optimal contract. Assuming that the optimal solution in case 5 is feasible, then the optimal wholesale price in case 3 is  $w^* = w_3$ . Define:

$$\begin{aligned}\zeta_6 &:= \frac{\mu s}{(1-\eta)(1-\mu)^2\tau_M} - \frac{I}{(1-\eta)(1-\mu)} + \frac{1}{(1-\eta)(1-\mu)\tau_M} \varphi \\ \zeta_7 &:= \frac{(1-\tau_M)(1-\alpha)c - \frac{\mu s}{1-\mu}}{(1-\mu)[1-(1-\mu)\tau_M]\eta\tau_M} + \frac{(1-\eta)(1-\mu)}{\eta(1-\mu)[1-(1-\mu)\tau_M]} \varphi\end{aligned}$$

Then, we have  $\pi_B^{1*} > \pi_B^{3*}$  when  $\tau_B > \zeta_6$ , and  $\pi_B^{1*} > \pi_B^{5*}$  when  $\tau_B > \zeta_4$ . We also have  $\pi_B^{3*} > \pi_B^{1*}$  when  $\tau_B < \zeta_6$ , and  $\pi_B^{3*} > \pi_B^{5*}$  when  $\tau_B > \zeta_7$ . Finally, we have  $\pi_B^{5*} > \pi_B^{1*}$  when  $\tau_B < \zeta_4$ , and  $\pi_B^{5*} > \pi_B^{3*}$  when  $\tau_B < \zeta_7$ . This corresponds to Figure 4 (iii). ■

**Proof of Corollary 1:** Part (i): It can be shown that  $\zeta_1$  and  $\zeta_6$  are independent of  $\alpha$  and  $c$ . When  $(1-\alpha)c$  decreases, the intercept of  $\zeta_2, \zeta_3, \zeta_4, \zeta_5, \zeta_7$  decreases, and the slope does not change. The region for the outcome  $(0, H_M, H_B)$  in all the panels of Figure 4 expands. The region for the outcome  $(1, H_B, L_M)$  in panel (iii) also expands.

Part (ii): When auditing is not performed (Figure 4 panel (i), i.e., when  $\tau_B < \frac{I}{\mu}$ ), the switching cost has no effect ( $\zeta_1, \zeta_2, \zeta_3$  are all independent of  $s$ ). When  $s$  increases, the intercept of  $\zeta_4, \zeta_5, \zeta_7$  decreases while the intercept of  $\zeta_6$  increases, and the slope does not change. The region for the outcome  $(0, H_M, H_B)$  in Figure 4 panel (ii) expands. The region for the outcome  $(1, L, L_M)$  in panel (iii) becomes smaller, so the combined region for  $(0, H_M, H_B)$  and  $(1, H_B, L_M)$  becomes bigger.

Part (iii): When  $\gamma$  increases, the slope of  $\zeta_1$  decreases, the intercept of  $\zeta_2$  decreases, the intercept and the absolute value of the slope of  $\zeta_3$  both decrease. So, the region for the outcome  $(0, H_M, H_B)$  expands in Figure 4 panel (i). In panel (ii), when  $\gamma$  increases, the intercept of  $\zeta_4$  decreases, the intercept and the absolute value of the slope of  $\zeta_5$  both decrease. Together with the fact that the slope of  $\zeta_1$  decreases, we have the result that the region for the outcome  $(0, H_M, H_B)$  expands. Finally, in panel (iii), when  $\gamma$  increases, the intercept and slope of  $\zeta_6$  both decrease. Together with the fact that the intercept of  $\zeta_4$  decreases, we have the result that the region for the outcome  $(0, H_M, H_B)$  also expands. ■

**Proof of Corollary 2:** First, recall that in the component procurement stage, the manufacturer's optimal supplier choice is given by Lemma 1(ii). The buyer's optimal auditing decision for given manufacturer's supplier choice are:  $A(\text{risk-free}) = 0$ ,  $A(\text{risky}) = 1$  if  $I \leq \mu\tau_B$ , and  $A(\text{risky}) = 0$  if  $I \geq \mu\tau_B$ . The equilibrium in (5) reduces to three cases:  $(A^*, S^*) = (0, H_B)$  if  $w \geq w_2$ ,  $(A^*, S^*) = (0, L_M)$  if  $w < w_2$  and  $I \geq \mu\tau_B$ , and  $(A^*, S^*) = (1, L_M)$  if  $w \leq w_4$  and  $I \leq \mu\tau_B$ . Next, we derive the optimal wholesale price in each case.

Case 1:  $(A^*, S^*) = (0, H_B)$  when  $w \geq w_2$ . The buyer solves the following problem:  $\max_w \pi_B^1 = r - w$  subject to  $w \geq w_2, w \geq c$ . By the assumption  $\tau_M < 1$ , we have  $w_2 > c$ . So,  $w^* = w_2$ .

Case 2:  $(A^*, S^*) = (0, L_M)$  when  $w < w_2$  and  $I \geq \mu\tau_B$ . The buyer solves the following problem:  $\max_w \pi_B^2 = r - w - \tau_B$  subject to  $w < w_2, (1 - \tau_M)(w - \alpha c) + \varphi \geq 0, I \geq \mu\tau_B$ . We have  $w^* = \alpha c - \frac{\varphi}{1 - \tau_M}$ .

Case 3:  $(A^*, S^*) = (1, L_M)$  when  $w \leq w_4$  and  $I < \mu\tau_B$ . The buyer solves the following problem:  $\max_w \pi_B^3 = r - w - (1 - \mu)\tau_B - I$  subject to  $w \geq \alpha c + \frac{\mu(1 - \alpha)c + \mu s - (1 - \mu)\varphi}{1 - (1 - \mu)\tau_M}, w \leq w_4, I < \mu\tau_B$ . The optimal wholesale price is  $w^* = \alpha c + \frac{\mu(1 - \alpha)c + \mu s - (1 - \mu)\varphi}{1 - (1 - \mu)\tau_M}$  and is feasible only when  $(1 - \alpha)c(1 - \tau_M) + \varphi > \frac{\mu s}{1 - \mu}$ .

Define:

$$\begin{aligned} \ell_1 : \tau_B &= \frac{(1 - \alpha)(1 - \tau_M)c + \varphi}{\tau_M(1 - \tau_M)} \\ \ell_2 : \tau_B &= \frac{I}{\mu} \\ \ell_3 : \tau_B &= \frac{(1 - \alpha)c(1 - \tau_M) + \varphi - \mu s \tau_M}{\tau_M(1 - \mu)[1 - (1 - \mu)\tau_M]} - \frac{I}{1 - \mu} \end{aligned}$$

First, consider the case when  $\tau_B$  is below the line  $\ell_2$  or equivalently  $I > \mu\tau_B$ , the buyer compares Cases 1 and 2. We have  $\pi_B^{1*} > \pi_B^{2*}$  when  $\tau_B$  is above  $\ell_1$  (Region  $A_a(1)$ ), and  $\pi_B^{1*} < \pi_B^{2*}$  when  $\tau_B$  is below  $\ell_1$  (Region  $B_a$ ). Now, consider the case when  $\tau_B$  is above the line  $\ell_2$  or equivalently  $I < \mu\tau_B$ , the buyer compares Cases 1 and 3. We have  $\pi_B^{1*} > \pi_B^{3*}$  when  $\tau_B$  is above  $\ell_3$  (Region  $A_a(2)$ ), and  $\pi_B^{1*} < \pi_B^{3*}$  when  $\tau_B$  is below  $\ell_3$  (Region  $C_a$ ). See Figure A.1. Combine Region  $A_a(1)$

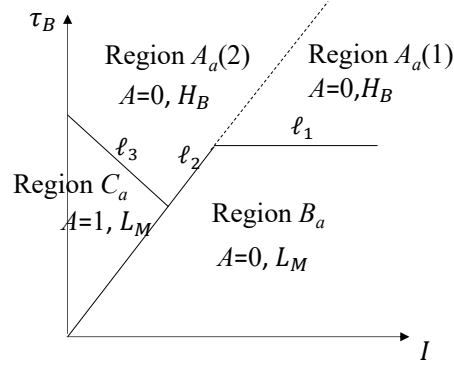

Figure A.1: Proof of Corollary 2

and  $A_a(2)$ , we get Region  $A_a$  in Figure 5. ■

**Proof of Proposition 4:** Proof of part (i): Under full delegation, the buyer's problem is similar to Cases 1 and 2 in the proof of Corollary 2 (but without the auditing cost constraint). The optimal contract is  $w^* = w_2$  when  $\tau_B$  is above the line  $\ell_1$  and  $w^* = \alpha c - \frac{\varphi}{1-\tau_M}$  when  $\tau_B$  is below  $\ell_1$ . The manufacturer chooses a risk-free supplier in the former case and a risky supplier in the latter case. Compare the full- and guided-delegation solutions, we see that in the dark shaded region (b) in Figure A.2 (i), the manufacturer chooses  $H_B$  under guided delegation and a risky supplier under full delegation. In the dark shaded region (a), the manufacturer chooses a risky supplier under either delegation strategy, but conducts auditing only under guided delegation. Finally, in the light shaded region, the manufacturer chooses a risk-free supplier under full delegation, but a risky supplier (although auditing is conducted) under guided delegation. The optimal contract and induced supplier selection are the same in the white regions.

Proof of part (ii): Under guided delegation, the buyer's optimal profit  $\pi_B^*$  is equal to  $r - w_2$  in region  $A_a$ , and  $r - \alpha c - \frac{\mu(1-\alpha)c + \mu s - (1-\mu)\varphi}{1-(1-\mu)\tau_M} - (1-\mu)\tau_B - I$  in region  $C_a$ . Under full delegation, the buyer's optimal profit  $\tilde{\pi}_B^*$  is equal to  $r - w_2$  when  $\tau_B$  is above  $\ell_1$ , and  $r - \alpha c + \frac{\varphi}{1-\tau_M} - \tau_B$  when  $\tau_B$  is below  $\ell_1$ . First, in region (c) in Figure A.2(ii),  $\pi_B^* - \tilde{\pi}_B^* = \tau_B - \frac{(1-\alpha)c(1-\tau_M) + \varphi}{\tau_M(1-\tau_M)} < 0$  since the region is below the line  $\ell_1$ . Second, in region (a),  $\pi_B^* - \tilde{\pi}_B^* = \frac{(1-\alpha)c(1-\tau_M) + \varphi - \mu s \tau_M}{\tau_M[1-(1-\mu)\tau_M]} - (1-\mu)\tau_B - I > 0$  since the region is below the line  $\ell_3$ . Finally, define line  $\ell_4$  as:

$$\ell_4 : \tau_B = \frac{(1-\alpha)c + s}{1-(1-\mu)\tau_M} + \frac{\varphi}{[1-(1-\mu)\tau_M](1-\tau_M)} + \frac{I}{\mu}$$

In the shaded region (b),  $\pi_B^* - \tilde{\pi}_B^* = \mu \left\{ \tau_B - \frac{(1-\alpha)c + s}{1-(1-\mu)\tau_M} - \frac{\varphi}{[1-(1-\mu)\tau_M](1-\tau_M)} \right\} - I$ . So, the buyer earns a higher profit under guided delegation when  $\tau_B$  is above the line  $\ell_4$ , and a higher profit under full delegation when  $\tau_B$  is below  $\ell_4$ . The optimal contract and induced supplier selection are the same in the white regions, and therefore the buyer's profit is the same under the two delegation strategies.

**Proof of Proposition 5:** When sourcing from his preferred (low-type) supplier  $L_M$ , the manufacturer's profit function  $\hat{\pi}_M(L_M)$  is given in (8). The manufacturer's optimal auditing decision is given in (9). When sourcing from a high-type supplier  $H$ , the manufacturer's profit is  $\hat{\pi}_M(H) = w - c$ . The manufacturer's optimal supplier choice can be derived by comparing  $\hat{\pi}_M(H)$

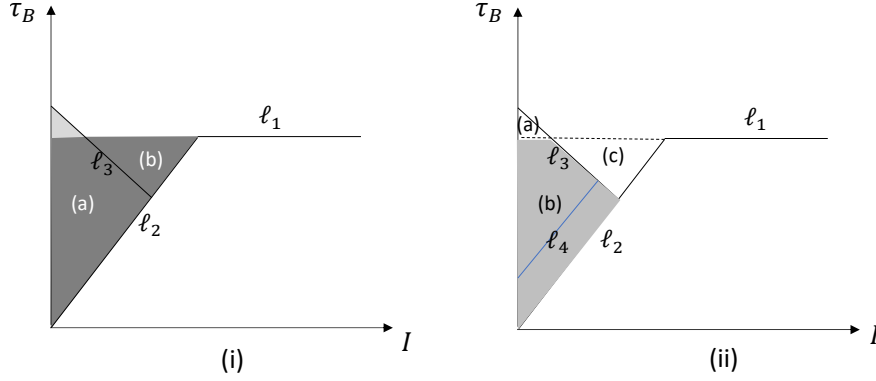

Figure A.2: Proof of Proposition 4

and  $\hat{\pi}_M(L_M)$  at the optimal auditing level.

When  $I > I_1 := \theta\mu\{\beta\gamma(w - \alpha c) - [(1 - \alpha)c + s]\}$ , we have  $\hat{\pi}_M(H) - \hat{\pi}_M(L_M)|_{e=0} = \tau_M(w - \alpha c) - (1 - \alpha)c - \varphi$ . When  $I \leq I_1$ , we have  $\hat{\pi}_M(H) - \hat{\pi}_M(L_M)|_{e=1} = I - I_2$ , where  $I_2 := (1 - \alpha)c + \varphi - \theta\mu[(1 - \alpha)c + s] - \tau_M(1 - \mu)(w - \alpha c)$ .

When  $\tau_M(w - \alpha c) \leq (1 - \alpha)c + \varphi$ , we have  $I_1 \leq I_2$ . When  $I \leq I_1$ , we must have  $I \leq I_2$ . Therefore, it follows that  $\hat{\pi}_M(L_M)|_{e=1} > \hat{\pi}_M(H)$ , and the manufacturer's optimal decision is  $(L_M, e = 1)$ . When  $I > I_1$ , we have  $\hat{\pi}_M(L_M)|_{e=0} > \hat{\pi}_M(H)$ , and the manufacturer's optimal decision is  $(L_M, e = 0)$ . Part (a) follows.

When  $\tau_M(w - \alpha c) > (1 - \alpha)c + \varphi$ , we have  $I_1 > I_2$ . When  $I \leq I_2$ , we have  $\hat{\pi}_M(L_M)|_{e=1} > \hat{\pi}_M(H)$ , and the manufacturer's optimal decision is  $(L_M, e = 1)$ . When  $I_2 < I \leq I_1$ , we have  $\hat{\pi}_M(H) > \hat{\pi}_M(L_M)|_{e=1}$ , and the manufacturer prefers  $H$ . When  $I > I_1$ , we have  $\hat{\pi}_M(H) > \hat{\pi}_M(L_M)|_{e=0}$ , and the manufacturer again prefers  $H$ . Part (b) follows. ■

**Proof of Proposition 6:** We first solve each sub-problem below.

$$P1: \max_w r - w$$

$$s.t. \tau_M(w - \alpha c) > (1 - \alpha)c + \varphi; I \geq I_2; \hat{\pi}_M(H) = w - c \geq 0$$

The first constraint can be expressed as  $w \geq \alpha c + \frac{(1 - \alpha)c + \varphi}{\tau_M}$ . Since  $\alpha c + \frac{(1 - \alpha)c + \varphi}{\tau_M} > c$ , the last constraint is always satisfied. The second constraint can be expressed as  $w \geq \alpha c + \frac{(1 - \alpha)c(1 - \theta\mu) - \theta\mu s + \varphi - I}{\tau_M(1 - \mu)}$ . Define:

$$I_3 := (1 - \alpha)c(1 - \theta)\mu + \mu\varphi - \theta\mu s \quad (A-1)$$

When  $I \geq I_3$ ,  $\hat{w}_1^* = \alpha c + \frac{(1 - \alpha)c + \varphi}{\tau_M}$ ; otherwise,  $\hat{w}_1^* = \alpha c + \frac{(1 - \alpha)c(1 - \theta\mu) - \theta\mu s + \varphi - I}{\tau_M(1 - \mu)}$ .

$$P2: \max_w (r - w) - (1 - \mu)\tau_B$$

$$s.t. \tau_M(w - \alpha c) > (1 - \alpha)c + \varphi; I \leq I_2,$$

$$\hat{\pi}_M(L_M)|_{e=1} = w - \alpha c - \theta\{\mu[(1 - \alpha)c + s] + (1 - \mu)\beta\gamma(w - \alpha c)\} + \varphi - I \geq 0$$

The first constraint can be expressed as  $w \geq \alpha c + \frac{(1 - \alpha)c + \varphi}{\tau_M}$ . The second constraint can be

expressed as  $w \leq \alpha c + \frac{(1-\alpha)c(1-\theta\mu)-\theta\mu s+\varphi-I}{\tau_M(1-\mu)}$ . The third constraint can be expressed as  $w \geq \alpha c + \frac{\theta\mu(1-\alpha)c+\theta\mu s+I-\varphi}{1-\tau_M(1-\mu)}$ . For the former two constraints to hold, feasibility requires that  $I \leq I_3$ . For the latter two constraints to hold, feasibility requires that  $\theta\mu s + I \leq (1-\alpha)c[1-\theta\mu-\tau_M(1-\mu)] + \varphi$ . When the first feasibility constraint holds, the second is also satisfied, and  $\alpha c + \frac{(1-\alpha)c+\varphi}{\tau_M} > \alpha c + \frac{\theta\mu(1-\alpha)c+\theta\mu s+I-\varphi}{1-\tau_M(1-\mu)}$ . Since the objective function is decreasing in  $w$ ,  $\hat{w}_2^* = \alpha c + \frac{(1-\alpha)c+\varphi}{\tau_M}$ .

$$\begin{aligned} P3 : \quad & \max_w (r - w) - (1 - \mu)\tau_B \\ & \text{s.t. } \tau_M(w - \alpha c) \leq (1 - \alpha)c + \varphi; I \leq I_1; \\ & \hat{\pi}_M(L_M)|_{e=1} = w - \alpha c - \theta \{ \mu [(1 - \alpha)c + s] + (1 - \mu)\beta\gamma(w - \alpha c) \} + \varphi - I \geq 0 \end{aligned}$$

The first constraint can be expressed as  $w \leq \alpha c + \frac{(1-\alpha)c+\varphi}{\tau_M}$ . The second constraint can be expressed as  $w \geq \alpha c + \frac{I+(1-\alpha)c\theta\mu+s\theta\mu}{\mu\tau_M}$ . The third constraint can be expressed as  $w \geq \alpha c + \frac{\theta\mu(1-\alpha)c+\theta\mu s+I-\varphi}{1-\tau_M(1-\mu)}$ . For the former two constraints to hold, feasibility requires that  $I \leq I_3$ . For the first and third constraints to hold, feasibility requires that  $(\theta\mu s + I)\tau_M \leq (1 - \alpha)c(1 - \tau_M(1 - \mu) - \theta\mu\tau_M) + \varphi(1 + \tau_M\mu)$ . When the first feasibility constraint holds, the second is also satisfied, and  $\alpha c + \frac{I+(1-\alpha)c\theta\mu+s\theta\mu}{\mu\tau_M} > \alpha c + \frac{\theta\mu(1-\alpha)c+\theta\mu s+I-\varphi}{1-\tau_M(1-\mu)}$ . Since the objective function is decreasing in  $w$ ,  $\hat{w}_3^* = \alpha c + \frac{I+(1-\alpha)c\theta\mu+s\theta\mu}{\mu\tau_M}$ .

$$\begin{aligned} P4 : \quad & \max_w (r - w) - \tau_B \\ & \text{s.t. } \tau_M(w - \alpha c) \leq (1 - \alpha)c + \varphi; I \geq I_1 \\ & \hat{\pi}_M(L_M)|_{e=0} = (1 - \tau_M)(w - \alpha c) + \varphi \geq 0 \end{aligned}$$

The first constraint can be expressed as  $w \leq \alpha c + \frac{(1-\alpha)c+\varphi}{\tau_M}$ . The second constraint can be expressed as  $w \leq \alpha c + \frac{I+(1-\alpha)c\theta\mu+s\theta\mu}{\mu\tau_M}$ . The third constraint can be expressed as  $w \geq \alpha c - \frac{\varphi}{1-\tau_M}$ . Since the objective function is decreasing in  $w$ ,  $\hat{w}_4^* = \alpha c - \frac{\varphi}{1-\tau_M}$ .

Next, we compare the optimal solutions across the four sub-problems to obtain optimal solution to the original problem. It is easy to check that  $\hat{\pi}_B^{P3} > \hat{\pi}_B^{P2}$  since P2 and P3 have the same objective function which is decreasing in  $w$  and  $\hat{w}_3^* < \hat{w}_2^*$ . When  $I \geq I_3$ , only P1 and P4 are feasible, and we have  $\hat{\pi}_B^{P1} - \hat{\pi}_B^{P4} = \tau_B - \frac{(1-\alpha)c}{\tau_M} - \frac{\varphi}{\tau_M(1-\tau_M)}$ . So the optimal solution is given by P1 (i.e.,  $H$ ) in Region  $\hat{A}_1$  shown in Figure A.3, and is given by P4 ( $L_M, e = 0$ ) in Region  $\hat{B}_1$ .

When  $I \leq I_3$ , we need to compare the optimal solutions from P1, P3, and P4. Define:

$$\begin{aligned} \ell'_2 : \tau_B &= \frac{(1-\alpha)c+s}{\mu\beta\gamma} + \frac{\varphi}{(1-\tau_M)\mu} + \frac{I}{\mu^2\tau_M} \\ \ell'_3 : \tau_B &= \frac{(1-\alpha)c(1-\theta\mu)-\theta\mu s}{\tau_M(1-\mu)} + \frac{\varphi(1-\tau_M\mu)}{\tau_M(1-\mu)(1-\tau_M)} - \frac{I}{\tau_M(1-\mu)} \\ \ell'_4 : \tau_B &= \frac{(1-\alpha)c(1-\theta)\mu + \varphi\mu - \theta\mu s - I}{\tau_M(1-\mu)^2\mu} \end{aligned}$$

Since  $\hat{\pi}_B^{P1} - \hat{\pi}_B^{P4} = \tau_B - \left\{ \frac{(1-\alpha)c(1-\theta\mu)-\theta\mu s}{\tau_M(1-\mu)} + \frac{\varphi(1-\tau_M\mu)}{\tau_M(1-\mu)(1-\tau_M)} - \frac{I}{\tau_M(1-\mu)} \right\}$ , when  $\tau_B$  is above line

$\ell'_3$ , we have  $\hat{\pi}_B^{P1} > \hat{\pi}_B^{P4}$  and the comparison is between  $P1$  and  $P3$ . Since  $\hat{\pi}_B^{P1} - \hat{\pi}_B^{P3} = \tau_B - \frac{(1-\alpha)c(1-\theta)\mu + \varphi\mu - \theta\mu s - I}{\tau_M(1-\mu)^2\mu}$ , the optimal solution is given by  $P1$  (i.e.,  $H$ ) in region  $\hat{A}_2$ , and is given by  $P3$  ( $L_M, e = 1$ ) in region  $\hat{C}_1$ . When  $\tau_B$  is below line  $\ell'_3$ , we have  $\hat{\pi}_B^{P4} > \hat{\pi}_B^{P1}$  and the comparison is between  $P4$  and  $P3$ . Since  $\hat{\pi}_B^{P3} - \hat{\pi}_B^{P4} = \tau_B - \left\{ \frac{(1-\alpha)c+s}{\tau_M} + \frac{\varphi}{(1-\tau_M)\mu} + \frac{I}{\tau_M\mu} \right\}$ , the optimal solution is given by  $P3$  in region  $\hat{C}_2$  ( $L_M, e = 1$ ), and is given by  $P4$  ( $L_M, e = 0$ ) in region  $\hat{B}_2$ .

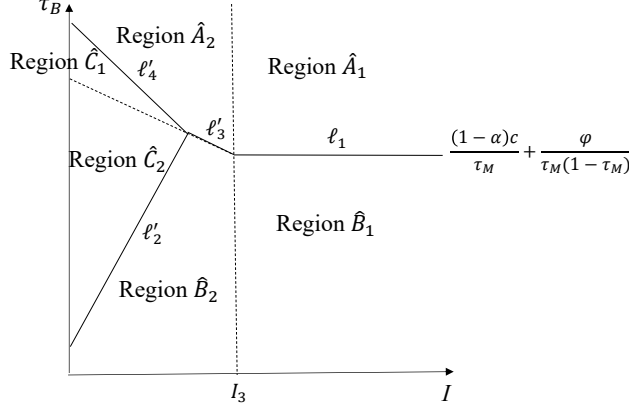

Figure A.3: Proof of Proposition 6

In summary, combining regions  $\hat{A}_1$  and  $\hat{A}_2$ , we get region  $\hat{A}$  in Figure 8. Combining regions  $\hat{B}_1$  and  $\hat{B}_2$ , we get region  $\hat{B}$ . Combining regions  $\hat{C}_1$  and  $\hat{C}_2$ , we get region  $\hat{C}$ . ■

**Proof of Proposition 7:** Proof of part (i): In Figure 9 panel (i), the buyer-auditing solution is characterized by the boundary lines  $\ell_1, \ell_2, \ell_3$ . The manufacturer-auditing solution is characterized by the boundary lines  $\ell_1, \ell'_2, \ell'_3, \ell'_4$ . In the dark shaded region (b), the manufacturer chooses  $H_B$  in the buyer-auditing model and  $L_M$  in the manufacturer-auditing model. In the dark shaded region (a), the manufacturer chooses  $L_M$  in both models. But auditing is conducted only in the buyer-auditing model. The optimal contract and induced supplier selection and auditing decision are the same in the white regions.

Proof of part (ii): We refer to Figure A.4 for this proof. In Region (1), the manufacturer chooses a risk-free supplier in both models, so the buyer earns a profit of  $r - w$ . The optimal wholesale price is  $w^* = w_2 = \alpha c + \frac{(1-\alpha)c + \varphi}{\tau_M}$  in the buyer-auditing model, and is  $\hat{w}^* = \hat{w}_1 = \alpha c + \frac{(1-\alpha)c(1-\theta)\mu - \theta\mu s + \varphi - I}{\tau_M(1-\mu)}$ . Since  $\hat{w}^* - w^* = \frac{I_3 - I}{\tau_M(1-\mu)} > 0$ , we have  $\pi_B^* > \hat{\pi}_B^*$ .

In Region (2),  $\pi_B^* = r - \alpha c - \frac{(1-\alpha)c + \varphi}{\tau_M}$  and  $\hat{\pi}_B^* = r - \alpha c + \frac{\varphi}{1-\tau_M} - \tau_B$ . We have  $\pi_B^* - \hat{\pi}_B^* = \tau_B - \left[ \frac{(1-\alpha)c}{\tau_M} + \frac{\varphi}{\tau_M(1-\tau_M)} \right]$ . So  $\pi_B^* > \hat{\pi}_B^*$  if and only if  $\tau_B$  is above the boundary line  $\ell_1$ .

In Region (3),  $\pi_B^* = r - \alpha c - \frac{(1-\alpha)c + \varphi}{\tau_M}$  and  $\hat{\pi}_B^* = r - \alpha c - \frac{\theta\mu[(1-\alpha)c + s] + I}{\mu\tau_M} - (1-\mu)\tau_B$ . We have  $\pi_B^* - \hat{\pi}_B^* = \frac{(1-\mu)\mu\tau_M\tau_B - [(1-\alpha)c(1-\theta)\mu + \varphi\mu - \theta\mu s - I]}{\mu\tau_M}$ . It can be shown that the line  $\tau_B = \frac{(1-\alpha)c(1-\theta)\mu + \varphi\mu - \theta\mu s - I}{(1-\mu)\mu\tau_M}$  is below the boundary line  $\ell_3$  since the intercept of the former is smaller than the latter ( $\frac{(1-\alpha)c(1-\theta)\mu + \varphi\mu - \theta\mu s}{(1-\mu)\mu\tau_M} - \frac{(1-\alpha)c(1-\tau_M) + \varphi - \mu s\tau_M}{\tau_M(1-\mu)[1-(1-\mu)\tau_M]} = \frac{-I_3(1-\mu)\tau_M - \theta s(1-\mu\beta\gamma)}{\tau_M[1-(1-\mu)\tau_M](1-\mu)} < 0$ ) and the absolute value of the slope of the former is larger than the latter. Therefore,  $\pi_B^* > \hat{\pi}_B^*$ .

In Region (4),  $\pi_B^* = r - \alpha c - \frac{(1-\alpha)c\mu + \mu s - (1-\mu)\varphi}{1-(1-\mu)\tau_M} - (1-\mu)\tau_B - I$ , and  $\hat{\pi}_B^* = r - \alpha c - \frac{(1-\alpha)c\theta\mu + \theta\mu s + I}{\mu\tau_M} -$

$(1 - \mu)\tau_B$ . We have  $\pi_B^* - \hat{\pi}_B^* = \frac{\theta[1-\tau_M-\mu\beta\gamma(1-\theta)][(1-\alpha)c\mu+\mu]+I(1-\mu\tau_M)[1-(1-\mu)\tau_M]+(1-\mu)\mu\tau_M\varphi}{\mu\tau_M[1-(1-\mu)\beta\gamma]} > 0$ .

In Region (5),  $\pi_B^* = r - \alpha c - \frac{(1-\alpha)c\mu + \mu s - (1-\mu)\varphi}{1-(1-\mu)\tau_M} - (1-\mu)\tau_B - I$ , and  $\hat{\pi}_B^* = r - \alpha c + \frac{\varphi}{1-\tau_M} - \tau_B$ . We have  $\pi_B^* - \hat{\pi}_B^* = \mu\tau_B - I - \frac{\mu\{(1-\tau_M)[(1-\alpha)c+s]+\varphi\}}{(1-\tau_M)[1-(1-\mu)\tau_M]}$ . Define  $\ell'_5$  as  $\tau_B = \frac{(1-\tau_M)[(1-\alpha)c+s]+\varphi}{(1-\tau_M)[1-(1-\mu)\tau_M]} + \frac{I}{\mu}$ . Clearly,  $\ell'_5$  is above  $\ell_2$ . It can also be shown that  $\ell'_5$  is below  $\ell'_2$  since the intercept of the former is smaller than the latter ( $\frac{(1-\tau_M)[(1-\alpha)c+s]+\varphi}{(1-\tau_M)[1-(1-\mu)\tau_M]} - [\frac{(1-\alpha)c+s}{\mu\beta\gamma} + \frac{\varphi}{(1-\tau_M)\mu}] = \frac{[(1-\alpha)c+s][\mu\beta\gamma(1-\theta)-(1-\theta\beta\gamma)]}{\mu\beta\gamma[1-(1-\mu)\tau_M]} - \frac{\varphi(1-\mu)}{\mu[1-(1-\mu)\tau_M]} < 0$ ) and the slope of the former is smaller than the latter. Therefore, in this region, we have  $\pi_B^* > \hat{\pi}_B^*$  when  $\tau_B$  is above  $\ell'_5$  and  $\pi_B^* < \hat{\pi}_B^*$  when  $\tau_B$  is below  $\ell'_5$ . ■

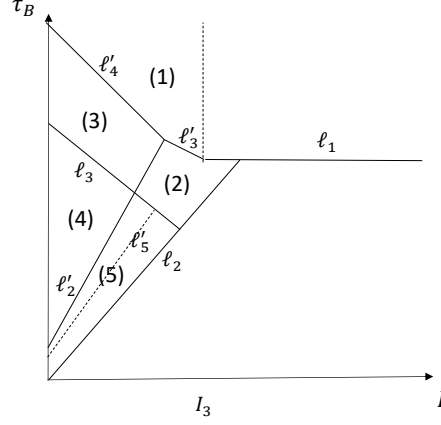

Figure A.4: Proof of Proposition 7 part (ii)
